# Supplementary material
Source: PubMed Central journal article supplement (PMC2665947)
Supplement: supp_180_8_814_v2_2.pdf [file supp_180_8_814_v2_2.pdf]

**Appendix 2 (as submitted by the authors):** Characteristics of participants aged 40 years and older, selected by the status of marijuana smoking of having ever versus never used at least 50 joints of marijuana in a lifetime.

|                                                                 | Never marijuana smokers<br><i>N</i> <sub>1</sub> = 650 | Ever marijuana smokers<br><i>N</i> <sub>2</sub> = 214 | <i>P</i> Value |
|-----------------------------------------------------------------|--------------------------------------------------------|-------------------------------------------------------|----------------|
| Age (yr)                                                        | 58.0 ± 12.4                                            | 50.7 ± 7.4                                            | <0.001         |
| Gender, men                                                     | 239 (36.8%)                                            | 125 (58.4%)                                           | <0.001         |
| Race, white                                                     | 478 (76.7%)                                            | 193 (92.3%)                                           | <0.001         |
| Education high school                                           | 155 (24.0%)                                            | 47 (22.0%)                                            | 0.551          |
| Annual income less than \$25000                                 | 116 (22.3%)                                            | 26 (14.0%)                                            | 0.016          |
| Body mass index (kg/m <sup>2</sup> )                            | 26.7 ± 5.4                                             | 26.6 ± 4.8                                            | 0.910          |
| Post bronchodilator FEV <sub>1</sub> % pred                     | 98.3 ± 18.5                                            | 103.2 ± 14.3                                          | < 0.001        |
| Post bronchodilator FVC% pred                                   | 100.5 ± 16.4                                           | 105.4 ± 14.2                                          | < 0.001        |
| Current cigarette smokers                                       | 58 (8.9%)                                              | 56 (26.2%)                                            | < 0.001        |
| Pack year*                                                      | 15.3 (5.3–32.0)                                        | 18.1 (6.7–32.0)                                       | 0.271          |
| Current asthma                                                  | 55 (8.5%)                                              | 11 (5.1%)                                             | 0.110          |
| Asthma history                                                  | 98 (15.1%)                                             | 25 (11.7%)                                            | 0.218          |
| Hospitalization due to breathing problem before 10 years of age | 54 (8.3%)                                              | 19 (8.9%)                                             | 0.795          |
| Heart disease history                                           | 75 (11.5%)                                             | 20 (9.4%)                                             | 0.374          |
| Hypertension history                                            | 153 (23.5%)                                            | 24 (11.2%)                                            | < 0.001        |
| Diabetes history                                                | 46 (7.1%)                                              | 13 (6.1%)                                             | 0.614          |
| Tuberculosis history                                            | 19 (2.9%)                                              | 7 (3.3%)                                              | 0.796          |

Continuous variables are expressed as mean (SD) and dichotomous variables are expressed as number (% column totals).

\* Median and interquartile range for those who had non-zero pack year (*n* = 453), Wilcoxon Two-Sample test was used for *p* value.
