# Supplementary material
Source: PubMed Central journal article supplement (PMC2665947)

**Appendix 3 (as submitted by the authors):** Distribution curves of lifetime totals of tobacco and marijuana smoked, expressed as pack-years for tobacco cigarettes and as lifetime total of marijuana cigarettes smoked, in a random sample of participants aged 40 years and older in Vancouver, BC.

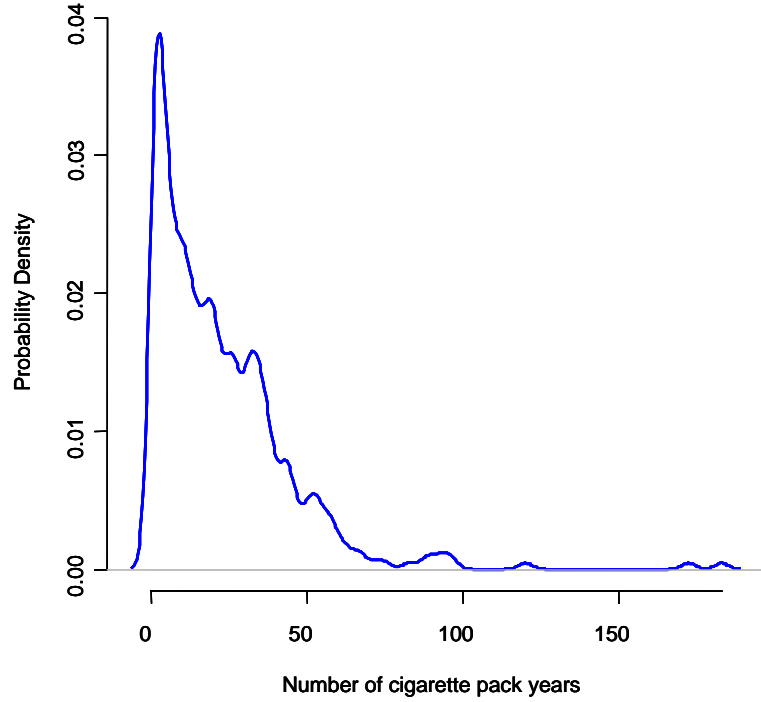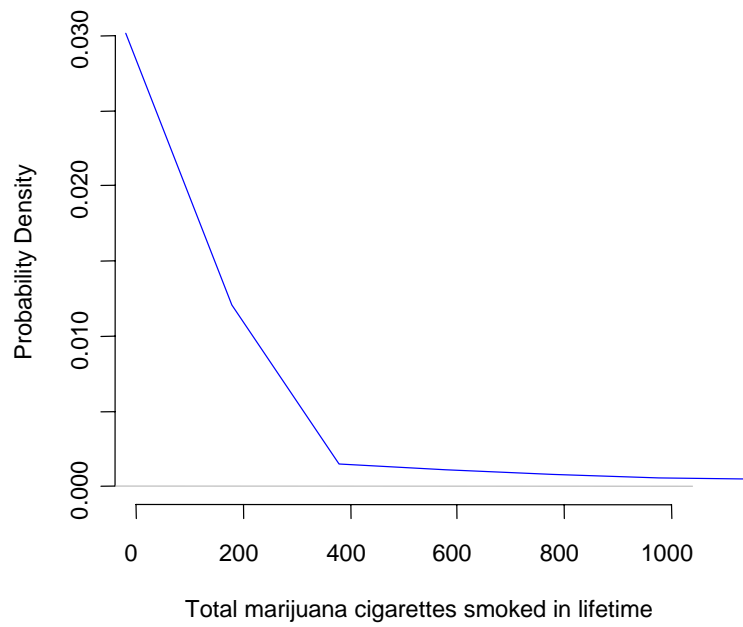

Supplement: supp_180_8_814_v2_3.pdf [file supp_180_8_814_v2_3.pdf]
